# Supplementary material
Source: HighWire-hosted journal article supplement (http://www.ajnr.org/highwire/filestream/52542/field_highwire_adjunct_files/0/3916_table.pdf)
Supplement: 3916_table.pdf [file 3916_table.pdf]

**On-line Table: Patients with blunt cerebrovascular injury**

| Patient No. | History                                                    | Age (yr) | Sex | Cervical Seatbelt Sign | GCS Score | Reason for Neck CTA                                                                                                                                                                            | Neck CTA Results                                                                           | Head CT                                                                                              | Basilar Skull Fracture | Intracranial Hemorrhage | Maxillofacial Fracture                         | Rib Fracture | Clavicle Fracture | Cervical Spine Fracture                                                     | Outcome                                      |
|-------------|------------------------------------------------------------|----------|-----|------------------------|-----------|------------------------------------------------------------------------------------------------------------------------------------------------------------------------------------------------|--------------------------------------------------------------------------------------------|------------------------------------------------------------------------------------------------------|------------------------|-------------------------|------------------------------------------------|--------------|-------------------|-----------------------------------------------------------------------------|----------------------------------------------|
| 1           | ATV injury, clothesline injury to neck by low-hanging wire | 13.17    | M   | NA                     | 3         | Cable injury to anterior neck                                                                                                                                                                  | Right cervical vertebral artery (grade IV)                                                 | Hypoxic-ischemic injury, subarachnoid hemorrhage                                                     | No                     | Yes                     | No                                             | No           | No                | C2-C3 fracture-dislocation and intraspinal epidural hematoma                | Death                                        |
| 2           | Dresser fell on head                                       | 2.17     | M   | NA                     | 14        | Basilar skull fractures approximating carotid canal, epistaxis, brief loss of consciousness                                                                                                    | Skull base hematoma, right cervical vertebral artery (grade III)                           | Comminuted, depressed occipital fracture with epidural hematoma                                      | Yes                    | Yes                     | Yes, nondisplaced mandibular condyle fractures | No           | No                | No                                                                          | Rehabilitation followed by discharge to home |
| 3           | MVC with ejection                                          | 9.92     | F   | No                     | 3         | Noncontrast CT head demonstrated acute left MCA infarct                                                                                                                                        | Left cervical ICA (grade II)                                                               | Left MCA acute infarct, multicompartimental hemorrhage, severe facial fractures, calvarium fractures | Yes                    | Yes                     | Yes, left Le Fort III and right Le Fort II     | No           | No                | No                                                                          | Death                                        |
| 4           | MVC                                                        | 15.33    | F   | No                     | NR        | Right hemiparesis, with MRI head demonstrating multiple left MCA embolic infarcts                                                                                                              | Left precavernous and cavernous ICA mildly decreased caliber compared with right (grade I) | Left frontal and temporal lobe contusions                                                            | Yes                    | Yes                     | NA                                             | No           | Right clavicle    | No                                                                          | Rehabilitation followed by discharge to home |
| 5           | ATV injury                                                 | 11.17    | M   | NA                     | 15        | Neck pain with first rib fracture                                                                                                                                                              | Left common carotid artery (grade IV), left cervical vertebral artery (grade IV)           | Neg                                                                                                  | No                     | No                      | NA                                             | Yes, 1st     | No                | No                                                                          | Discharge to home                            |
| 6           | MPC, with vehicle tires rolling over victim's head         | 1.17     | M   | NA                     | NR        | Skull base fractures                                                                                                                                                                           | Left cervical ICA (grade IV)                                                               | Neg                                                                                                  | Yes                    | No                      | NA                                             | NA           | NA                | No                                                                          | Discharge to home                            |
| 7           | MVC                                                        | 2.33     | F   | No                     | 3         | Anterior neck swelling with fracture dislocation at C4-C5                                                                                                                                      | Right cervical vertebral artery (grade IV)                                                 | Cerebral edema, right basal ganglia hematoma, subarachnoid, possible shear injury of corpus callosum | No                     | Yes                     | NA                                             | No           | No                | Fracture dislocation C4-C5 with marked distraction, likely cord transection | Death                                        |
| 8           | Dirt bike crash                                            | 16       | M   | NA                     | 14        | Patient initially discharged after accident with T4 compression fracture; returned to ER days later with head and neck pain, tingling in hands, face paresthesias, and difficulty moving mouth | Right cervical ICA (grade II)                                                              | Neg                                                                                                  | No                     | No                      | No                                             | No           | No                | No                                                                          | Discharge to home                            |

**Note:**—ATV indicates all-terrain vehicle; MPC, motor-pedestrian collision; NA, not applicable; ER, emergency department; Neg, negative; NR, not recorded.
